# Supplementary material
Source: Springer Nature journal article supplement (https://www.springermedizin.de/resource/supplementary/12894_2009_145_MOESM5_ESM.pdf/9514034)

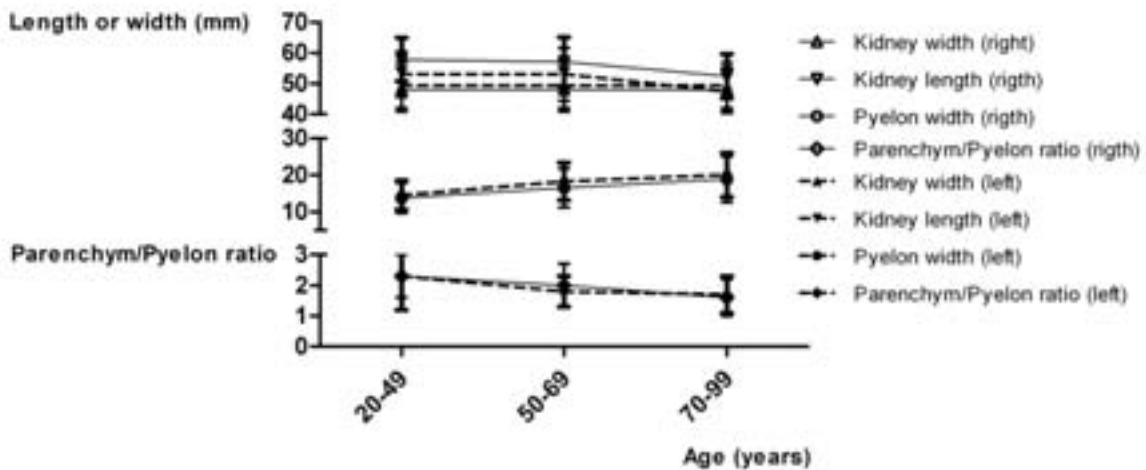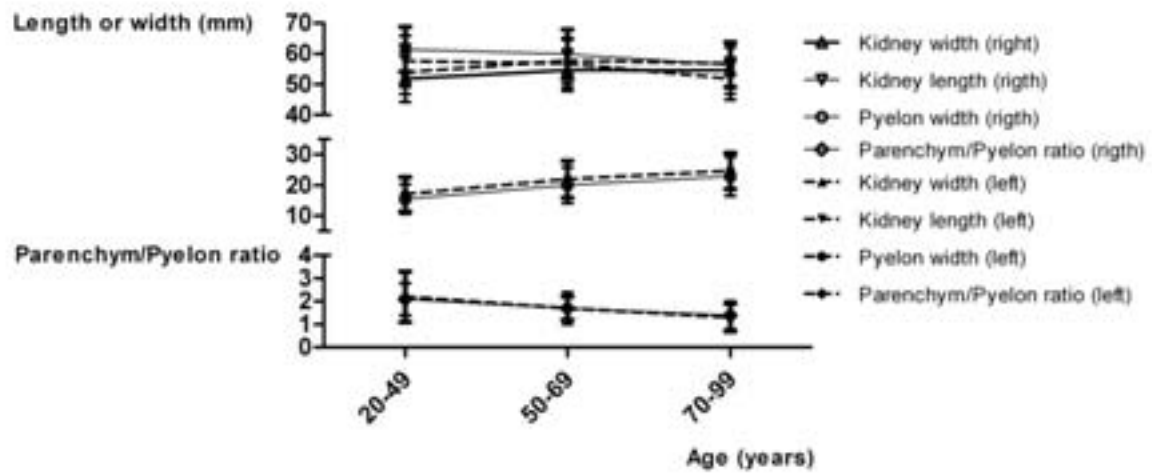

Supplement: MOESM5 [file 9514034]
